# Supplementary material
Source: PubMed Central journal article supplement (PMC8552357)
Supplement: NIHMS1566344-supplement-1.pdf [file NIHMS1566344-supplement-1.pdf]

## Supplementary Information

### Polysaccharide-based films for the prevention of unwanted postoperative adhesions at biological interfaces

Sarah M. Mayes <sup>a,\*</sup>, Jessica Davis <sup>a</sup>, Jessica Scott <sup>a</sup>, Vanessa Aguilar <sup>a</sup>, Scott A. Zawko <sup>b</sup>, Steve Swinnea <sup>b</sup>, Daniel L. Peterson <sup>a</sup>, John G. Hardy <sup>a,c,\*</sup>, Christine E. Schmidt <sup>a,c,\*</sup>

<sup>a</sup> Department of Biomedical Engineering, University of Texas at Austin, 107 W Dean Keeton St, Austin, TX 78712, USA.

<sup>b</sup> Department of Chemical Engineering, University of Texas at Austin, 200 E Dean Keeton St, Austin, TX 78712, USA.

<sup>c</sup> J. Crayton Pruitt Family Department of Biomedical Engineering, University of Florida, Biomedical Sciences Building JG-53, P.O. Box 116131, Gainesville, FL 32611-6131, USA.

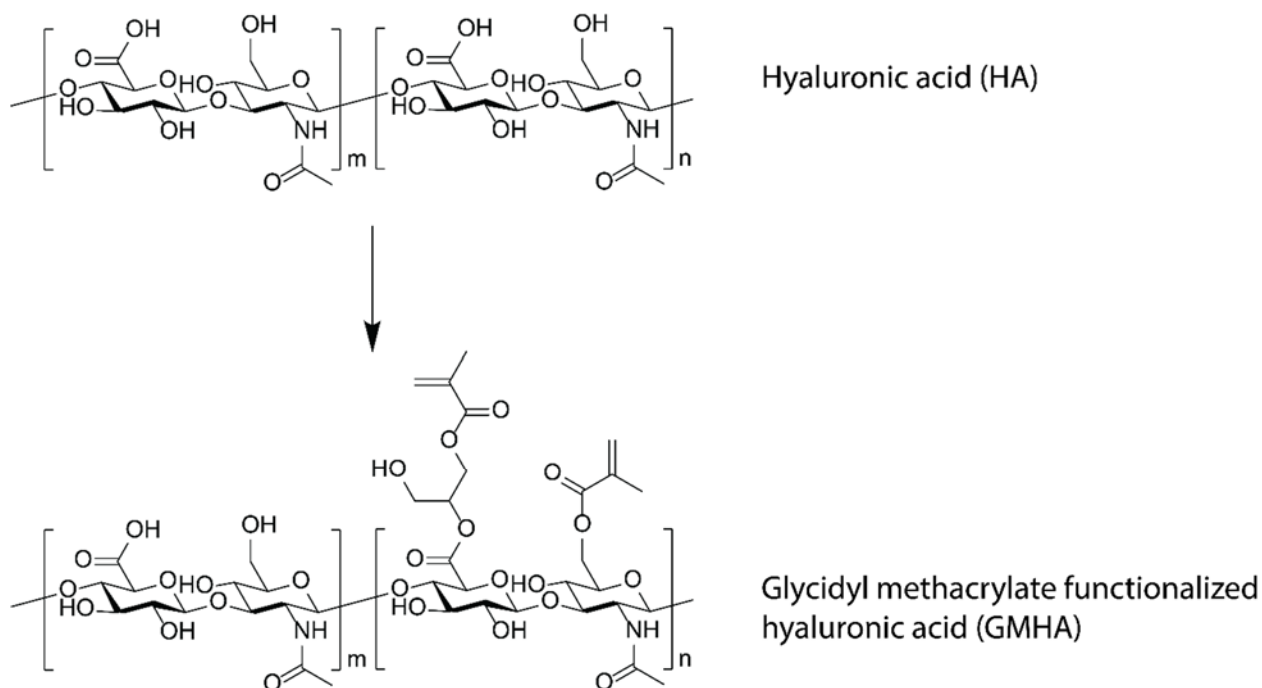

**Figure S1.** Conversion of hyaluronic acid to glycidyl methacrylate functionalized hyaluronic acid.

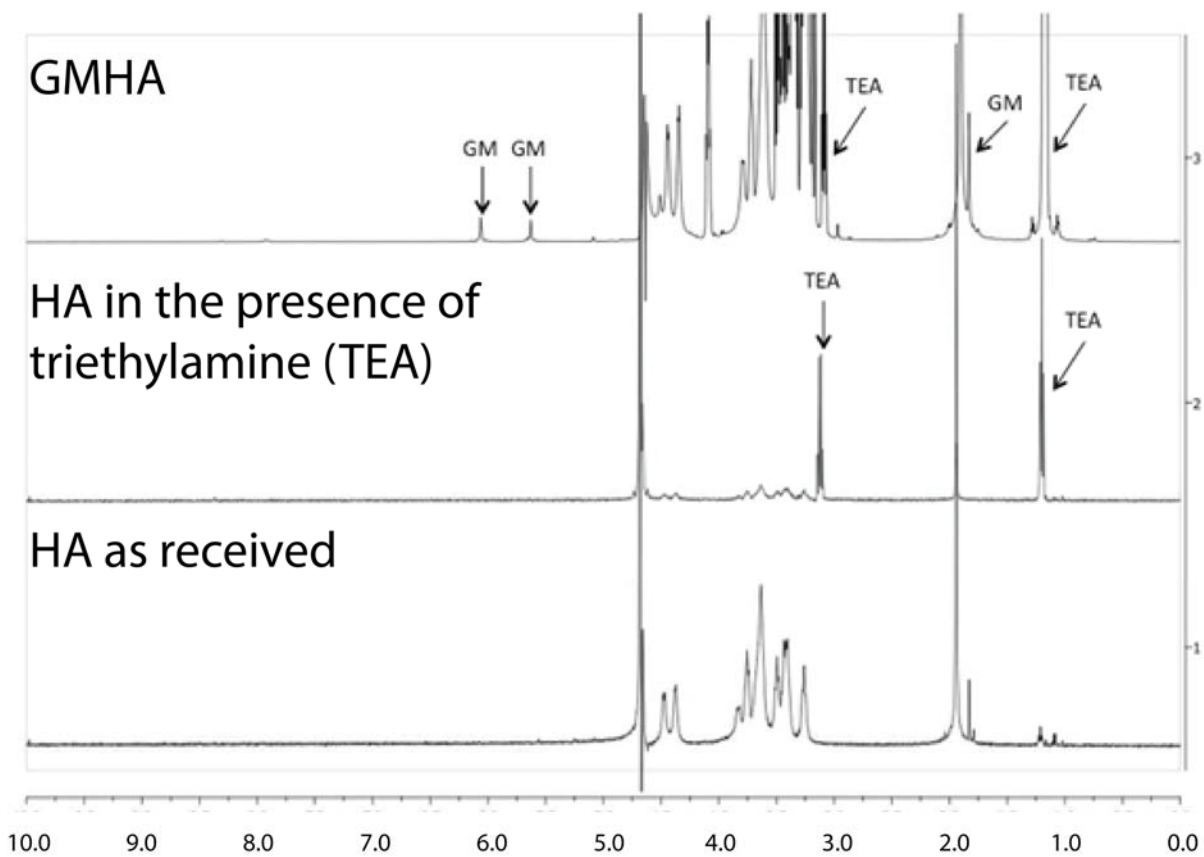

**Figure S2.** NMR spectra of hyaluronic acid alone, in the presence of trimethylamine and modified with glycidyl methacrylate.

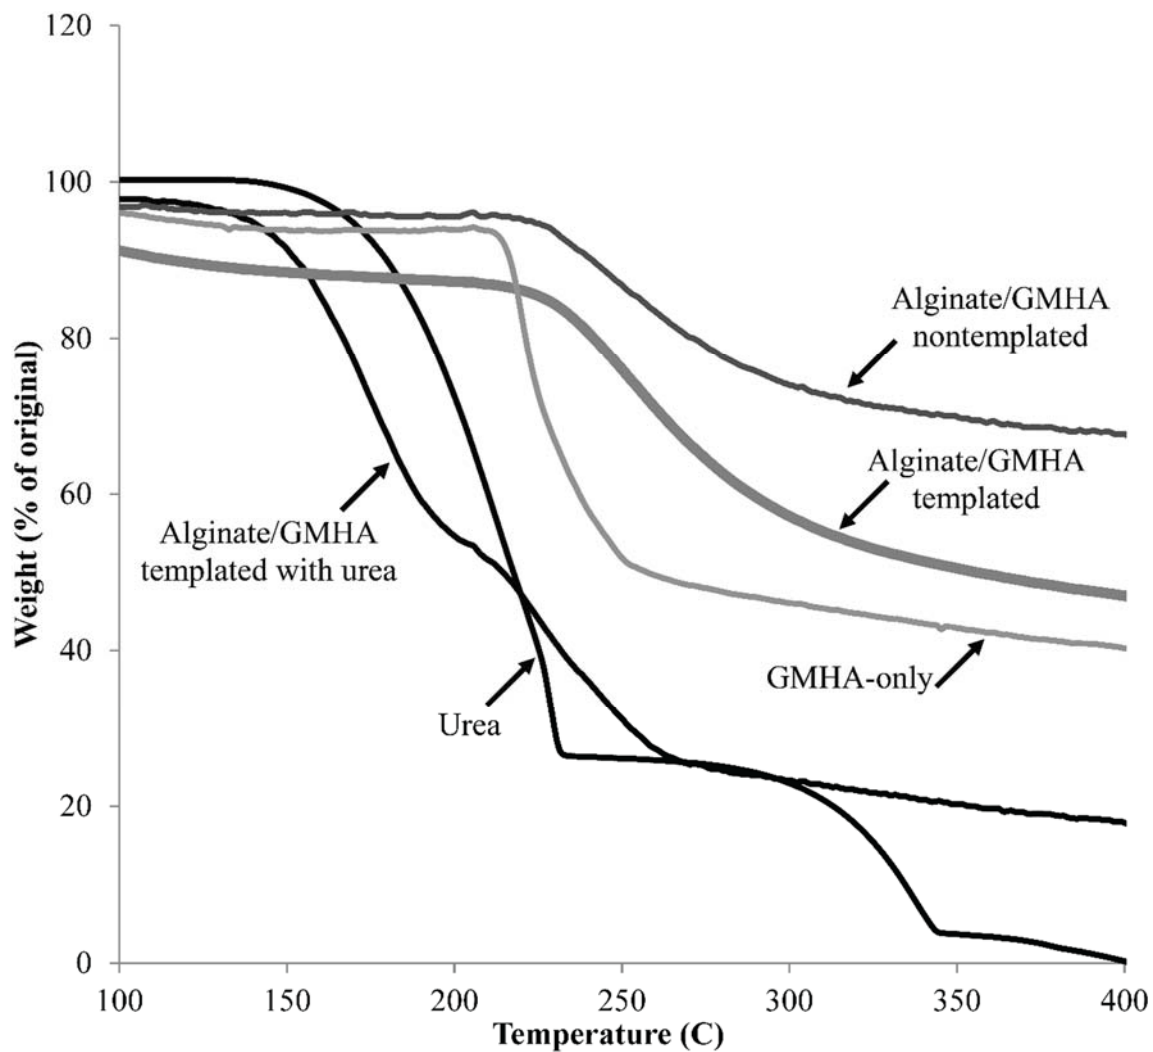

**Figure S3.** Thermogravimetric analysis (TGA) to confirm the complete removal of urea from the alginate/GMHA films after extensive washing.

$$\text{Modulus (MPa)} = \frac{\text{Tensile strength } \left(\frac{N}{\text{mm}^2}\right)}{\text{Elongation at break}} \quad [1]$$

$$E (\%) = 100\% * \frac{(L - L_0)}{L_0} \quad [2]$$

$$TS \left(\frac{N}{\text{mm}^2}\right) = \frac{F}{A} \quad [3]$$

$$T = \int_0^{\epsilon_B} \sigma(d\epsilon) \quad [4]$$

**Figure S4:** Equations related to the mechanical properties of the films.

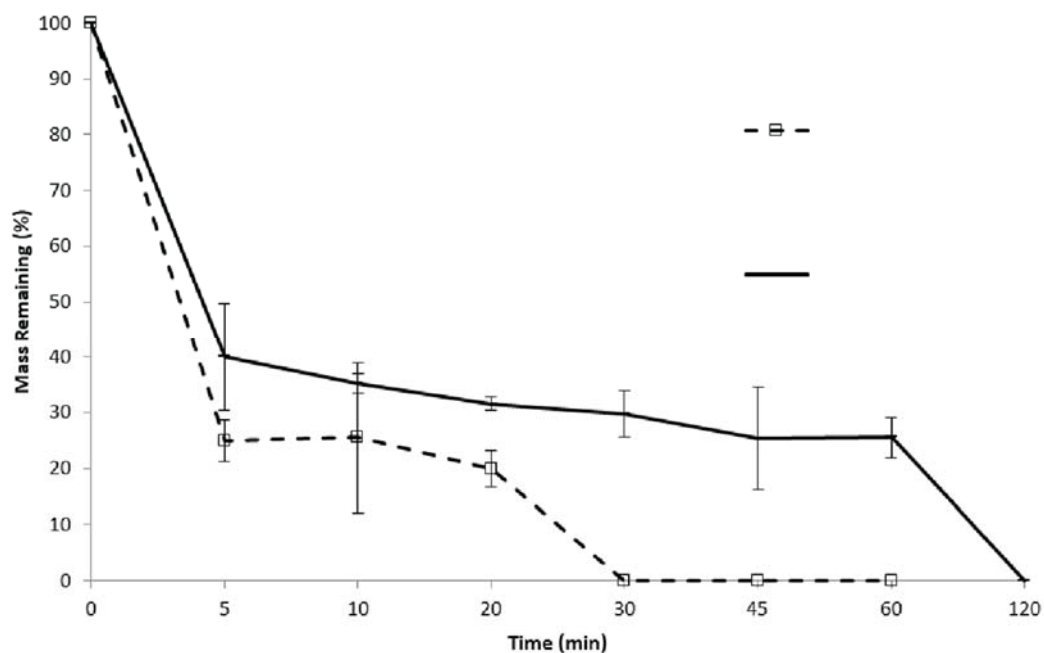

**Figure S5:** Dissolution of templated films compared to nontemplated films. Templated films degraded slower than nontemplated films. Nontemplated films went through complete dissolution with 30 min of exposure to 0.1 M citrate. An additional 90 min of exposure to 0.1 M citrate caused complete dissolution of the templated films. (N = 6).

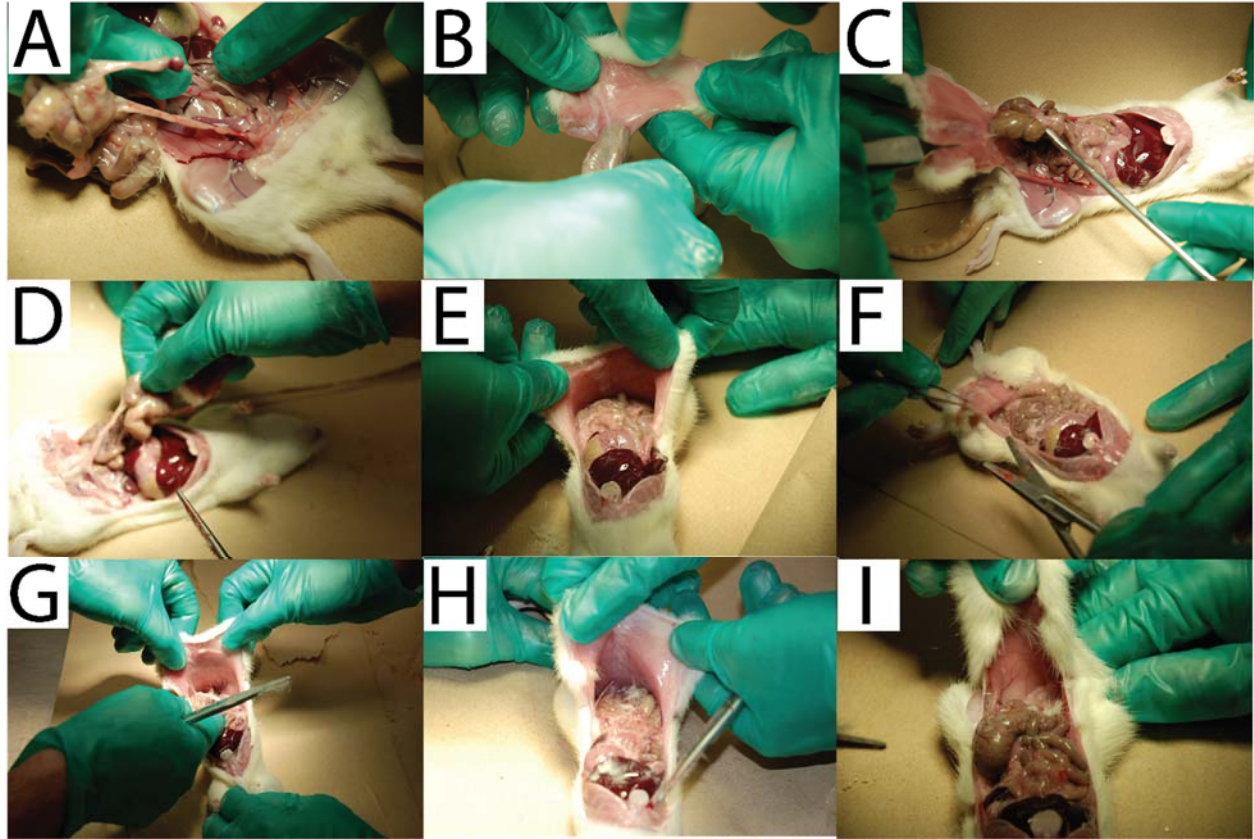

**Figure S6:** Examples of photographs of animals after surgery. *Control surgeries:* A) Rat 4529 – Grade 3. B) Rat 3557 – Grade 3. C) Rat 1525 – Grade 3. *Animals after implantation of Seprafilm®:* D) Rat 2455 – Grade 3. E) Rat 7443 – Grade 0. F) Rat 8451 – Grade 0. *Animals after implantation of alginate/GMHA films with sacrificial urea crystal template pores:* G) Rat 6715 – Grade 2. H) Rat 5717 – Grade 0. I) Rat 3734 – Grade 0.

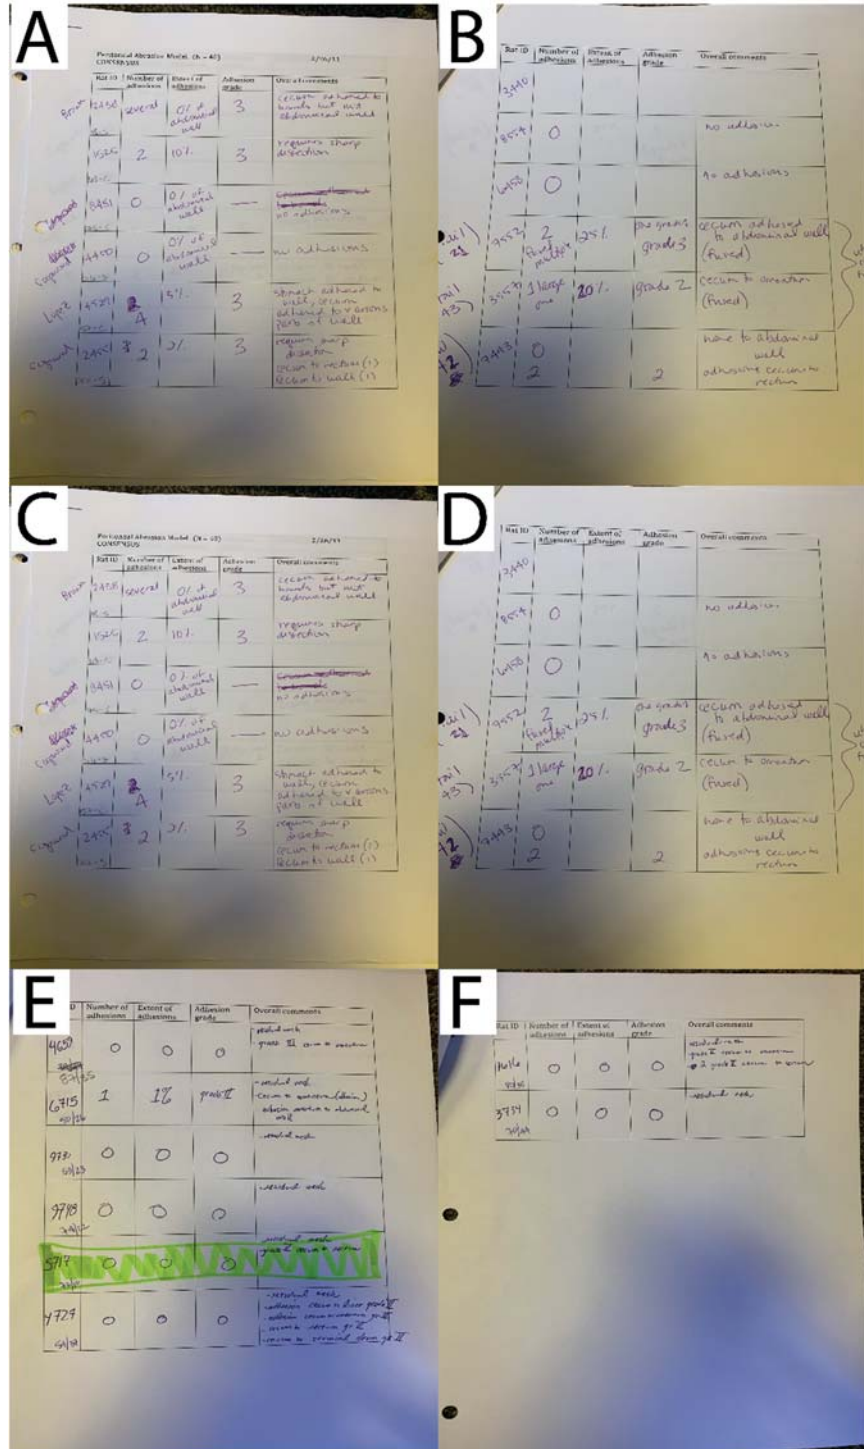

**Figure S7:** Examples of surgeon consensus sheets for animals after surgery. A&B) Control surgeries. C&D) Animals after implantation of Seprafilm®. E&F) Animals after implantation of alginate/GMHA films with sacrificial urea crystal template pores.

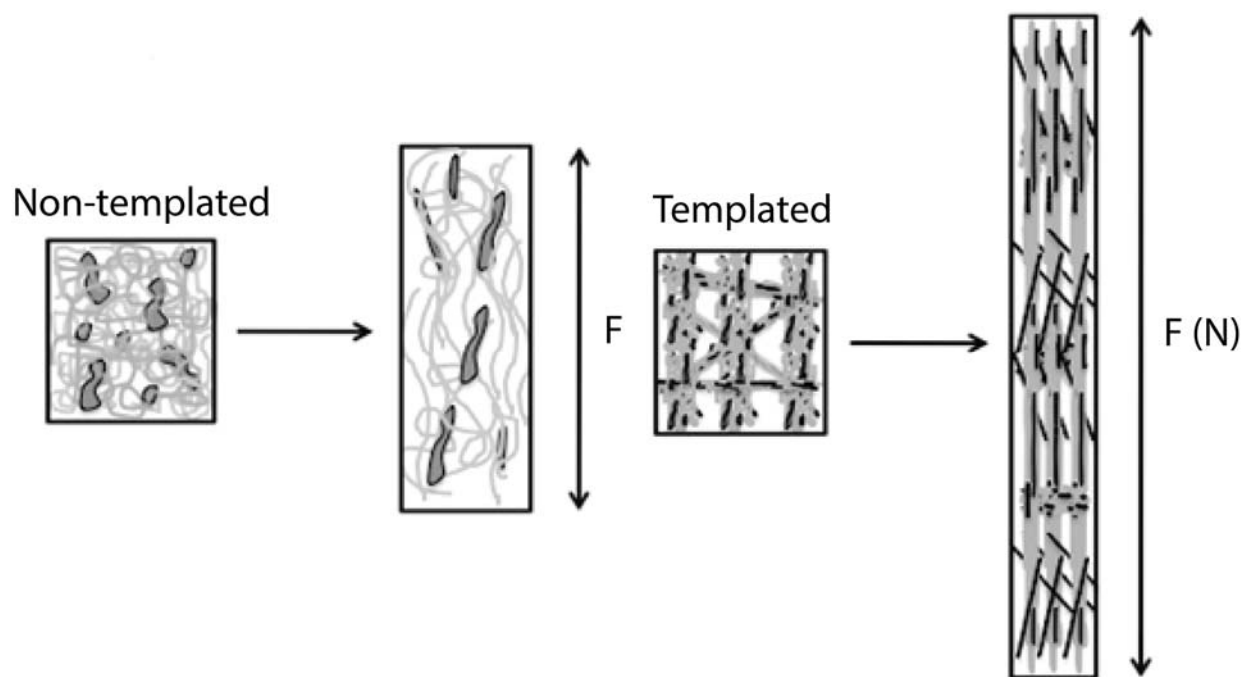

**Scheme S1:** Schematic illustrating the deformation of the films under tension.
